# Supplementary material
Source: PubMed Central journal article supplement (PMC5956914)
Supplement: NIHMS964832-supplement-S1.pdf [file NIHMS964832-supplement-S1.pdf]

**Supplemental Information**

**A Macrophage Colony-Stimulating-  
Factor-Producing  $\gamma\delta$  T Cell Subset  
Prevents Malarial Parasitemic Recurrence**

**Murad R. Mamedov, Anja Scholzen, Ramesh V. Nair, Katherine Cumnock, Justin A. Kenkel, Jose Henrique M. Oliveira, Damian L. Trujillo, Naresha Saligrama, Yue Zhang, Florian Rubelt, David S. Schneider, Yueh-hsiu Chien, Robert W. Sauerwein, and Mark M. Davis**

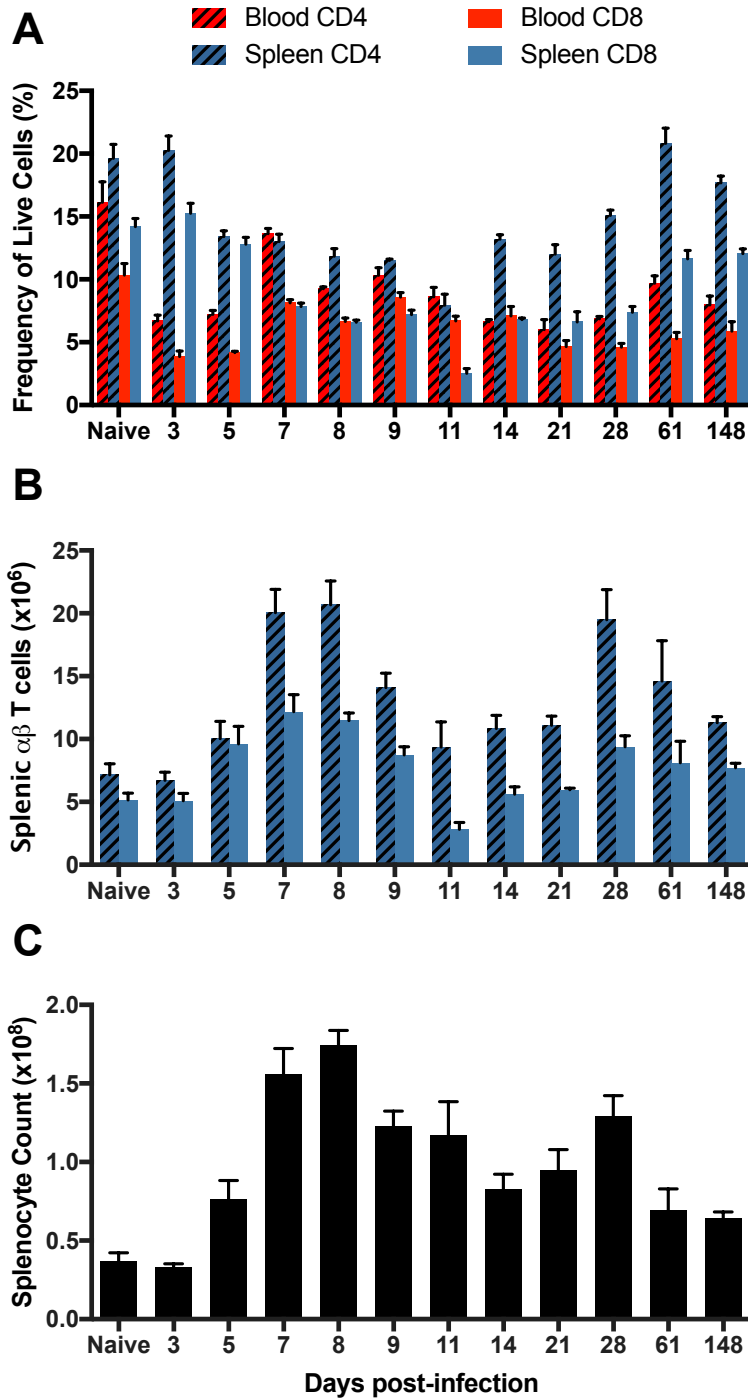

**Figure S1.** Related to Figure 1. Changing amounts of  $\alpha\beta$  T cells and splenocytes during *P. chabaudi* infection.

(A and B) The frequency in the blood and spleen (A) and the absolute number in the spleen (B) of CD4<sup>+</sup> and CD8<sup>+</sup>  $\alpha\beta$  T cells taken from C57BL/6 mice infected with  $10^5$  Pcc AJ-iRBCs.

(C) The number of splenocytes in C57BL/6 mice infected with  $10^5$  Pcc AJ-iRBCs.

(A-C) n=4 per time-point. Data shown as mean  $\pm$  SEM from one experiment.

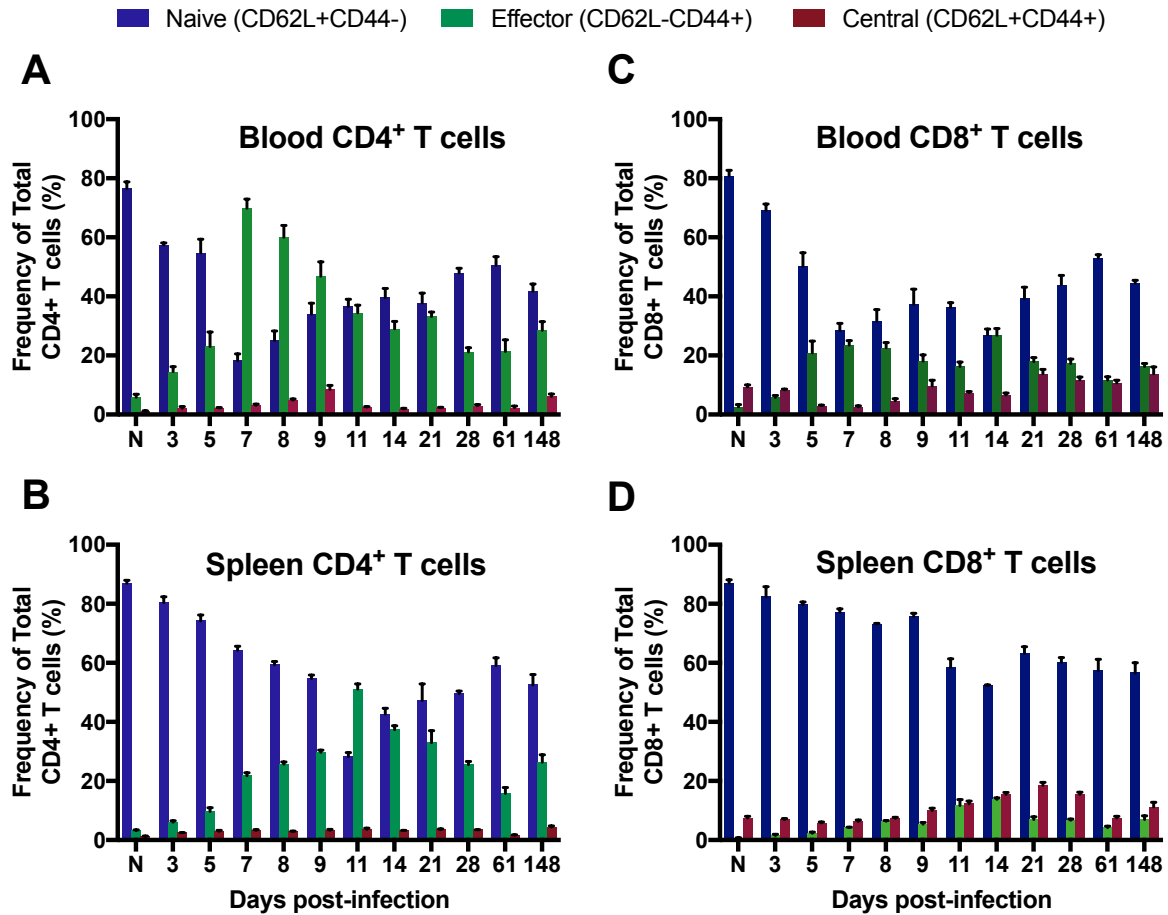

**Figure S2.** Related to Figure 1. Activated phenotypes of  $\alpha\beta$  T cells during *P. chabaudi* infection.

(A-D) The frequencies of naïve (CD62L<sup>+</sup>CD44<sup>-</sup>), effector (CD62L<sup>-</sup>CD44<sup>+</sup>), and central memory (CD62L<sup>+</sup>CD44<sup>+</sup>) blood-borne CD4<sup>+</sup>  $\alpha\beta$  T cells (A), splenic CD4<sup>+</sup>  $\alpha\beta$  T cells (B), blood-borne CD8<sup>+</sup>  $\alpha\beta$  T cells (C), and splenic CD8<sup>+</sup>  $\alpha\beta$  T cells (D) in naïve (N) and infected C57BL/6 mice. Data shown as mean  $\pm$  SEM from one experiment; n=4 per time-point.

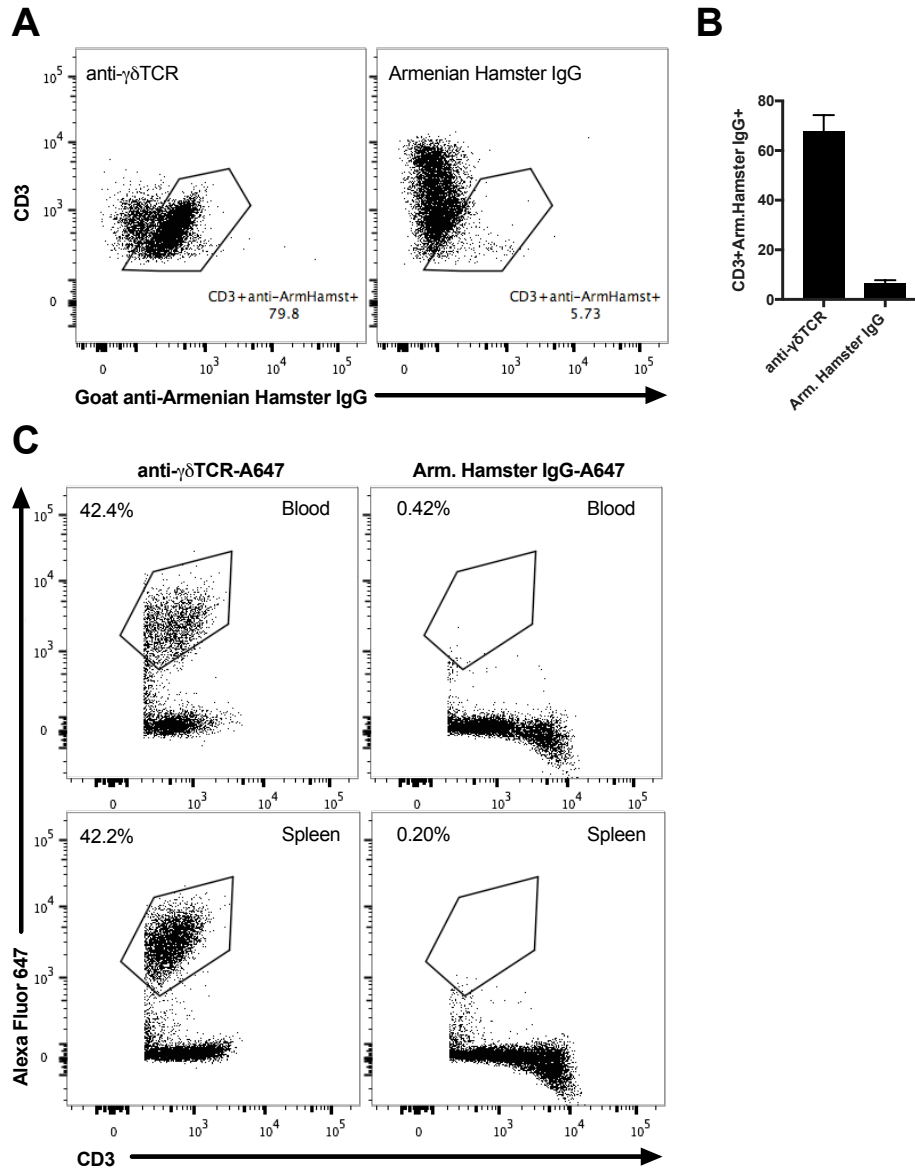

**Figure S3.** Related to Figure 3.  $\gamma\delta$  T cells persist after anti- $\gamma\delta$ TCR antibody administration. (A and B) Representative plots (A) and quantification (B) of CD3<sup>+</sup>Armenian Hamster IgG<sup>+</sup> cells among live CD3<sup>+</sup>CD4<sup>-</sup>CD8<sup>-</sup> splenocytes obtained at 14 d.p.i. from infected C57BL/6 mice (n=4 per group). The animals were administered at 12 d.p.i. i.p. 200  $\mu$ g of anti- $\gamma\delta$ TCR antibody (clone GL3, Armenian Hamster IgG isotype) or irrelevant Armenian Hamster IgG isotype control (clone HTK888; anti-trinitrophenol). After fixation and permeabilization, the cells were stained with goat anti-Armenian Hamster IgG secondary antibody. Data are representative of two independent experiments.

(C) Representative plots of CD3<sup>+</sup>Alexa Fluor 647<sup>+</sup> cells among live CD3<sup>+</sup>CD4<sup>-</sup>CD8<sup>-</sup> cells obtained at 14 d.p.i. from infected C57BL/6 mice (n=3 per group). The animals were injected at 12 d.p.i. i.p. 200  $\mu$ g of Alexa Fluor 647-conjugated anti- $\gamma\delta$ TCR (clone GL3, Armenian Hamster IgG isotype) or irrelevant Armenian Hamster IgG isotype control (clone HTK888; anti-trinitrophenol). None of the antibodies used in the staining panel were conjugated to Alexa Fluor 647 or equivalent dyes. Data shown are from one experiment.

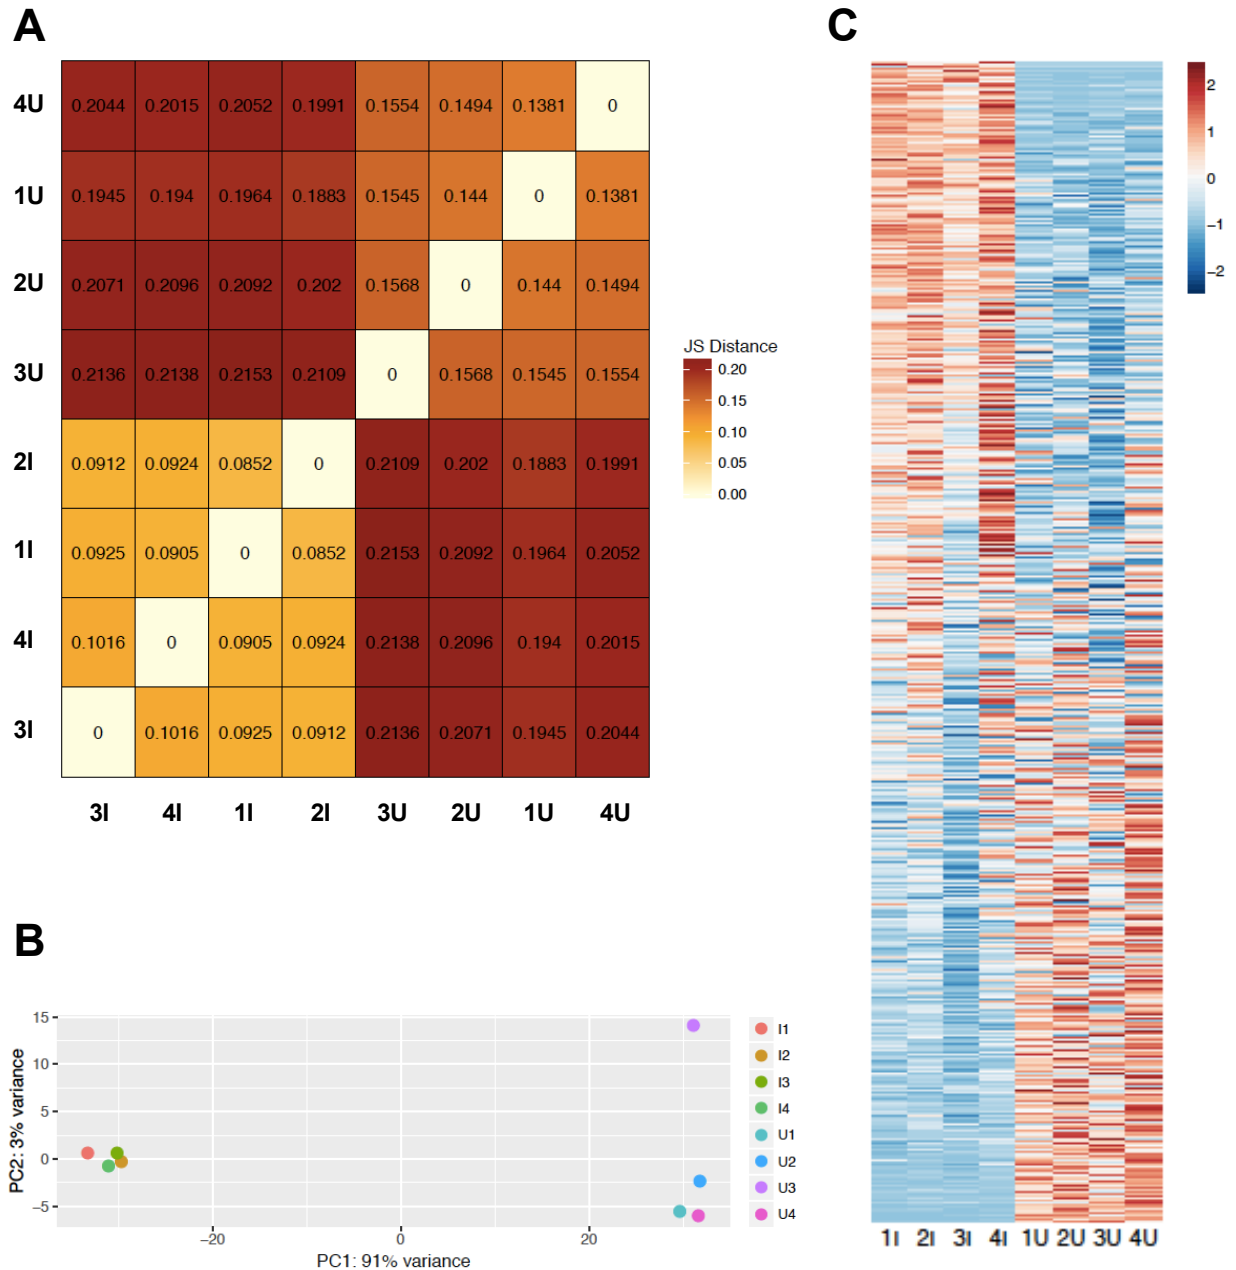

**Figure S4.** Related to Figure 5. Global comparison of  $\gamma\delta$  T cells from infected and uninfected animals.

(A) Pairwise comparisons of the global transcriptomes of splenic  $\gamma\delta$  T cells from infected (1I-4I) and uninfected (1U-4U) mice as measured by Jensen-Shannon (JS) distance scores. Samples were collected at 19 d.p.i..

(B) Principle component (PC) analysis transformation of global transcription by  $\gamma\delta$  T cells from infected and uninfected animals. Percentage of total variance accounted for by PC1 and PC2 shown.

(C) Normalized global transcription. Using gene expression measurements, the heat map shows Z-scores normalized within each gene of the entire identified transcriptome (9892 genes). Each row shows a separate gene.

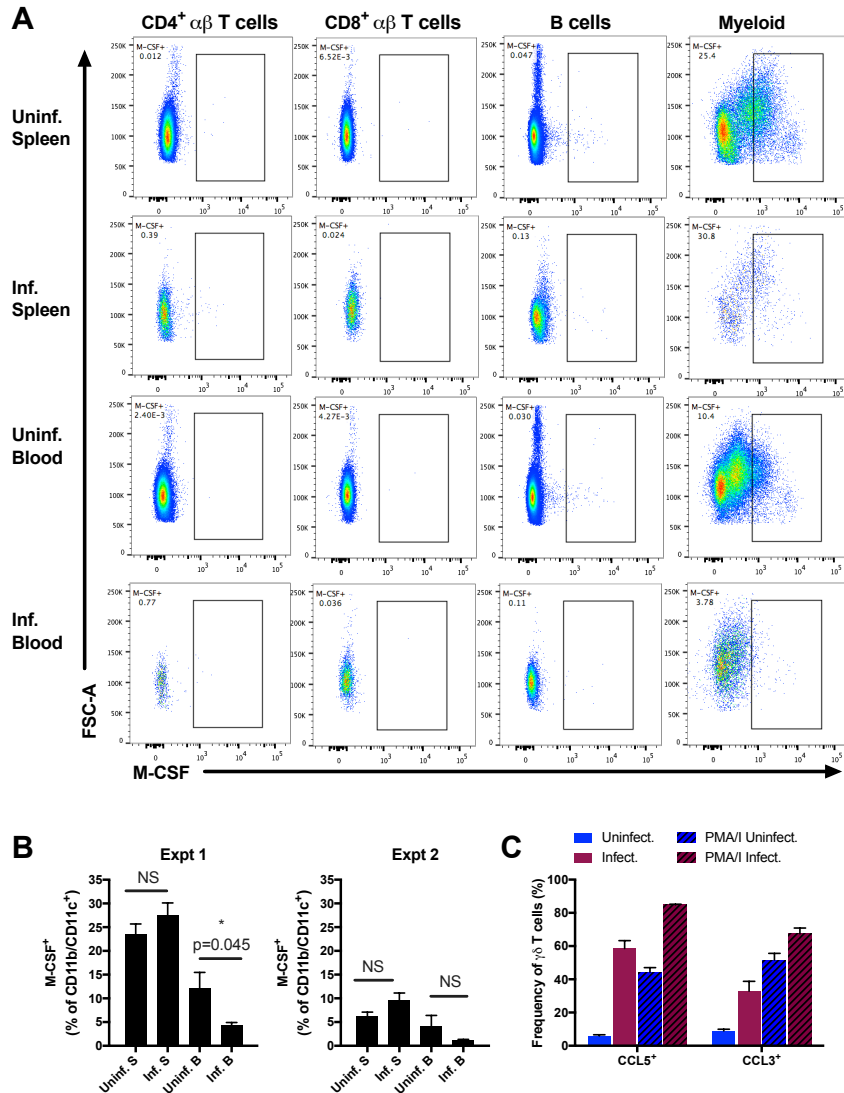

**Figure S5.** Related to Figure 5. M-CSF staining across leukocytes.

(A) Representative FACS pseudocolor plots of intracellular M-CSF staining in splenic and blood-borne CD4<sup>+</sup>  $\alpha\beta$  T cells (TCR $\beta$ <sup>+</sup>CD4<sup>+</sup>CD8<sup>-</sup> CD11b/CD11c<sup>-</sup>TCR $\gamma\delta$ <sup>-</sup>), CD8<sup>+</sup>  $\alpha\beta$  T cells (TCR $\beta$ <sup>+</sup>CD8<sup>+</sup>CD4<sup>-</sup> CD11b/CD11c<sup>-</sup>TCR $\gamma\delta$ <sup>-</sup>), B cells (CD19<sup>+</sup>CD4<sup>-</sup>CD8<sup>-</sup>CD11b/CD11c<sup>-</sup>TCR $\gamma\delta$ <sup>-</sup>), and myeloid cells (CD11b<sup>+</sup> and/or CD11c<sup>+</sup>, CD3<sup>-</sup>TCR $\beta$ <sup>-</sup>TCR $\gamma\delta$ <sup>-</sup>CD19<sup>-</sup>) from infected and uninfected vehicle control animals at 19 d.p.i. are shown. Data are representative of two independent experiments.

(B) Quantified M-CSF staining in splenic (S) and blood-borne (B) myeloid cells obtained from infected and uninfected vehicle control animals at 19 d.p.i. from two independent experiments.

(C) Frequency of blood-borne  $\gamma\delta$  T cells at 19 d.p.i. that are CCL5<sup>+</sup> and CCL3<sup>+</sup> with or without stimulation. Cells were cultured for 6 hours in the presence of protein trafficking inhibitors and in the absence or presence of PMA and ionomycin before staining. Data are representative of three independent experiments.

(A and B) n=5 per group, (C) n=4-5 per group. (B and C) Data shown as mean  $\pm$  SEM. Two-tailed, unpaired Student's *t*-test.

Table S1. Related to Figure 5. Clusters of Upregulated Genes

| Gene                                | Infected (FPKM±SEM) | Uninfected (FPKM±SEM) | Fold Change |
|-------------------------------------|---------------------|-----------------------|-------------|
| <b>Killer Cell Like Receptors</b>   |                     |                       |             |
| <i>Klra3</i>                        | 106.32 ± 23.71      | 2.59 ± 0.40           | 41.04       |
| <i>Klrb1b</i>                       | 229.14 ± 55.49      | 8.44 ± 2.50           | 27.14       |
| <i>Klre1</i>                        | 377.83 ± 52.65      | 24.57 ± 3.64          | 15.38       |
| <i>Klri1</i>                        | 462.52 ± 62.82      | 34.55 ± 5.44          | 13.39       |
| <i>Klrb1f</i>                       | 56.38 ± 4.46        | 4.82 ± 0.66           | 11.70       |
| <i>Klri2</i>                        | 99.38 ± 15.86       | 8.85 ± 2.24           | 11.22       |
| <i>Cd244</i> (NKR2B4)               | 84.14 ± 5.38        | 8.23 ± 1.12           | 10.22       |
| <i>Klra9</i>                        | 17.05 ± 6.39        | 1.38 ± 0.20           | 12.33       |
| <b>Cell Recruitment/Activation</b>  |                     |                       |             |
| <i>Spp1</i>                         | 123.36 ± 11.87      | 0.35 ± 0.04           | 348.34      |
| <i>Csf1</i> (M-CSF)                 | 456.29 ± 26.90      | 1.82 ± 0.26           | 251.23      |
| <i>Ccl3</i>                         | 229.87 ± 11.20      | 1.20 ± 0.49           | 191.47      |
| <i>Ccl4</i>                         | 70.09 ± 12.07       | 3.13 ± 2.07           | 22.42       |
| <i>Ccl6</i>                         | 16.54 ± 2.29        | 0.83 ± 0.40           | 20.02       |
| <i>Ccl5<sup>a</sup></i>             | 4085.63 ± 286.8     | 503.97 ± 62.26        | 8.11        |
| <i>Ccr12</i>                        | 62.56 ± 6.45        | 4.49 ± 1.24           | 13.94       |
| <i>Metrn1</i>                       | 36.40 ± 2.18        | 2.34 ± 0.07           | 15.56       |
| <i>S100a9</i>                       | 53.27 ± 12.54       | 2.48 ± 1.81           | 21.46       |
| <b>Cytotoxicity Associated</b>      |                     |                       |             |
| <i>Fcrl6</i>                        | 70.22 ± 19.23       | 0.76 ± 0.28           | 92.67       |
| <i>Gzmb</i>                         | 218.61 ± 26.32      | 6.59 ± 0.74           | 33.18       |
| <i>Ncf2</i>                         | 17.07 ± 1.22        | 0.69 ± 0.26           | 24.66       |
| <b>Attenuated Growth/Exhaustion</b> |                     |                       |             |
| <i>Havcr2</i> (Tim3)                | 27.01 ± 2.57        | 0.42 ± 0.25           | 64.34       |
| <i>Prdm1</i> (Blimp1)               | 51.16 ± 3.58        | 1.86 ± 0.21           | 27.51       |
| <i>Tigit</i>                        | 72.69 ± 4.19        | 5.21 ± 1.60           | 13.96       |
| <i>Entpd1</i>                       | 30.97 ± 2.34        | 2.25 ± 0.27           | 13.75       |
| <b>Apoptosis Regulation</b>         |                     |                       |             |
| <i>Bcl2a1d</i>                      | 77.94 ± 8.19        | 3.33 ± 0.92           | 23.39       |
| <i>Bcl2a1b</i>                      | 154.06 ± 17.63      | 10.68 ± 1.31          | 14.43       |
| <i>Htra3</i>                        | 31.35 ± 5.10        | 0.69 ± 0.17           | 45.64       |
| <i>Casp7</i>                        | 65.23 ± 3.00        | 5.36 ± 0.86           | 12.17       |
| <i>Entpd1</i>                       | 30.97 ± 2.34        | 2.25 ± 0.27           | 13.75       |
| <i>Birc5</i>                        | 20.52 ± 0.93        | 1.58 ± 0.52           | 12.95       |
| <i>Plekhf1</i>                      | 17.66 ± 0.94        | 1.44 ± 0.34           | 12.28       |
| <b>TCR Signaling</b>                |                     |                       |             |
| <i>Plcg2</i>                        | 63.72 ± 1.30        | 3.97 ± 0.70           | 16.05       |
| <i>Pik3ap1</i>                      | 115.42 ± 6.47       | 8.39 ± 0.98           | 13.76       |
| <i>Lat2</i>                         | 98.50 ± 1.92        | 7.16 ± 0.76           | 13.75       |
| <b>Cell Trafficking</b>             |                     |                       |             |
| <i>Gcnt1</i>                        | 14.11 ± 1.18        | 1.41 ± 0.55           | 10.00       |
| <i>Hpse</i>                         | 15.13 ± 0.67        | 0.52 ± 0.04           | 28.91       |
| <i>Itgad</i> (CD11d)                | 189.68 ± 7.68       | 4.20 ± 0.45           | 45.11       |
| <i>S1pr5</i>                        | 203.95 ± 13.95      | 4.55 ± 0.34           | 44.78       |
| <i>Adam8</i>                        | 21.64 ± 0.90        | 1.52 ± 0.48           | 14.26       |
| <i>Tiam2</i>                        | 11.09 ± 0.85        | 0.44 ± 0.37           | 24.94       |
| <i>Itgax</i> (CD11c)                | 60.31 ± 3.11        | 3.22 ± 0.34           | 18.70       |

Mean expression values (FPKM±SEM) in  $\gamma\delta$  T cells from infected mice (n=4) at 19 d.p.i. and uninfected control animals (n=4). Fold change calculated as (mean of infected)/(mean of uninfected). *Gene name* (Protein name). <sup>a</sup>Not in the top 50 upregulated immune-related genes.
